# Supplementary material for: Analysis of cuproptosis in hepatocellular carcinoma using multi-omics reveals a comprehensive HCC landscape and the immune patterns of cuproptosis
Source: Front Oncol. 2022 Nov 2;12:1009036. doi: 10.3389/fonc.2022.1009036 (PMC9666696; doi:10.3389/fonc.2022.1009036)
Supplement: Supplementary file 8 [file Table_1.xlsx]

## Sheet: Sheet1
Repository ID	Article	Sample	Gender	Age	Technique	Disease	Species
GSE156625	Onco-fetal Reprogramming of Endothelial Cells Drives Immunosuppressive Macrophages in Hepatocellular Carcinoma	P1	male	59	10X genomics	hepatocellular carcinoma	Human
GSE156625	Onco-fetal Reprogramming of Endothelial Cells Drives Immunosuppressive Macrophages in Hepatocellular Carcinoma	P2	female	71	10X genomics	hepatocellular carcinoma	Human
GSE156625	Onco-fetal Reprogramming of Endothelial Cells Drives Immunosuppressive Macrophages in Hepatocellular Carcinoma	P3	male	75	10X genomics	hepatocellular carcinoma	Human
GSE156625	Onco-fetal Reprogramming of Endothelial Cells Drives Immunosuppressive Macrophages in Hepatocellular Carcinoma	P4	male	68	10X genomics	hepatocellular carcinoma	Human
GSE156625	Onco-fetal Reprogramming of Endothelial Cells Drives Immunosuppressive Macrophages in Hepatocellular Carcinoma	P5	male	74	10X genomics	hepatocellular carcinoma	Human
GSE156625	Onco-fetal Reprogramming of Endothelial Cells Drives Immunosuppressive Macrophages in Hepatocellular Carcinoma	P6	female	72	10X genomics	hepatocellular carcinoma	Human
GSE156625	Onco-fetal Reprogramming of Endothelial Cells Drives Immunosuppressive Macrophages in Hepatocellular Carcinoma	P7	male	65	10X genomics	hepatocellular carcinoma	Human
GSE156625	Onco-fetal Reprogramming of Endothelial Cells Drives Immunosuppressive Macrophages in Hepatocellular Carcinoma	P8	female	48	10X genomics	hepatocellular carcinoma	Human
GSE156625	Onco-fetal Reprogramming of Endothelial Cells Drives Immunosuppressive Macrophages in Hepatocellular Carcinoma	P9	male	77	10X genomics	hepatocellular carcinoma	Human
GSE156625	Onco-fetal Reprogramming of Endothelial Cells Drives Immunosuppressive Macrophages in Hepatocellular Carcinoma	P10	male	77	10X genomics	hepatocellular carcinoma	Human
GSE156625	Onco-fetal Reprogramming of Endothelial Cells Drives Immunosuppressive Macrophages in Hepatocellular Carcinoma	P11	male	55	10X genomics	hepatocellular carcinoma	Human
GSE156625	Onco-fetal Reprogramming of Endothelial Cells Drives Immunosuppressive Macrophages in Hepatocellular Carcinoma	P13	male	56	10X genomics	hepatocellular carcinoma	Human
GSE156625	Onco-fetal Reprogramming of Endothelial Cells Drives Immunosuppressive Macrophages in Hepatocellular Carcinoma	P14	male	56	10X genomics	hepatocellular carcinoma	Human
GSE156625	Onco-fetal Reprogramming of Endothelial Cells Drives Immunosuppressive Macrophages in Hepatocellular Carcinoma	P15	male	76	10X genomics	hepatocellular carcinoma	Human
